# Supplementary material for: Development of a Novel Prognostic Model of Glioblastoma Based on m6A-Associated Immune Genes and Identification of a New Biomarker
Source: PubMed Central journal article supplement (PMC9348864; doi:10.3389/fonc.2022.868415), 2022-07-20

# Supplementary Figure 1

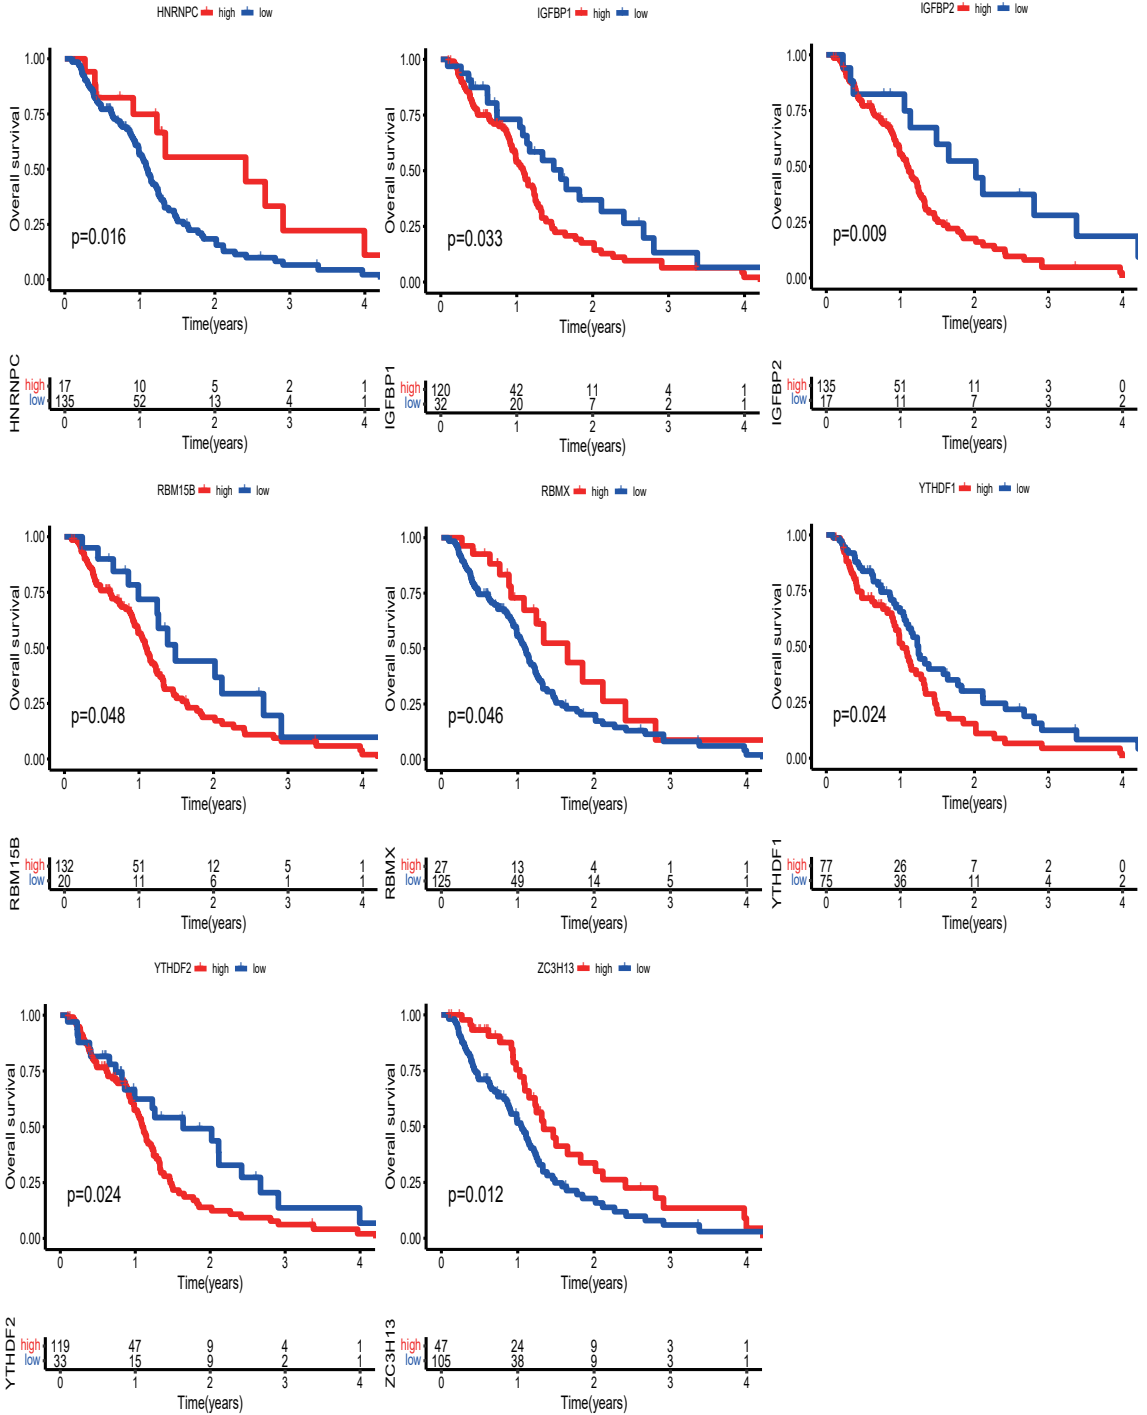

# Supplementary Figure 2

**A**

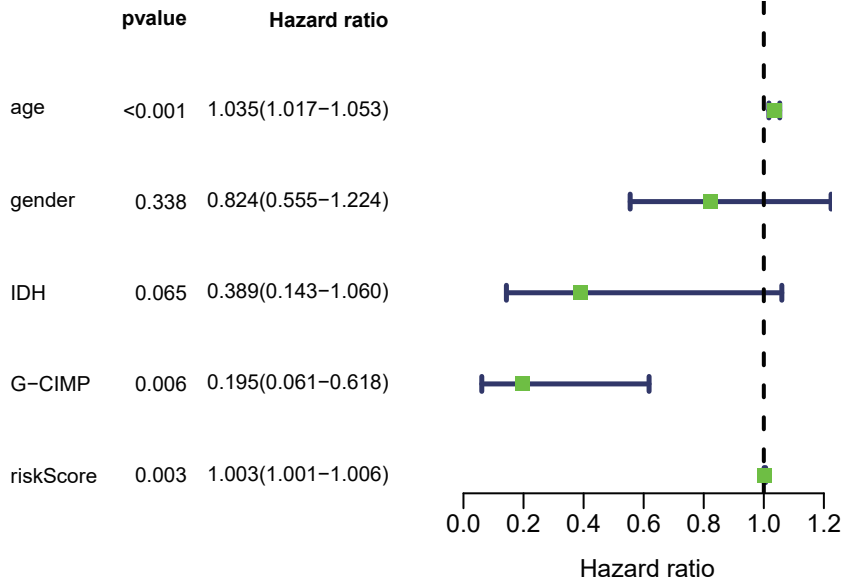

**B**

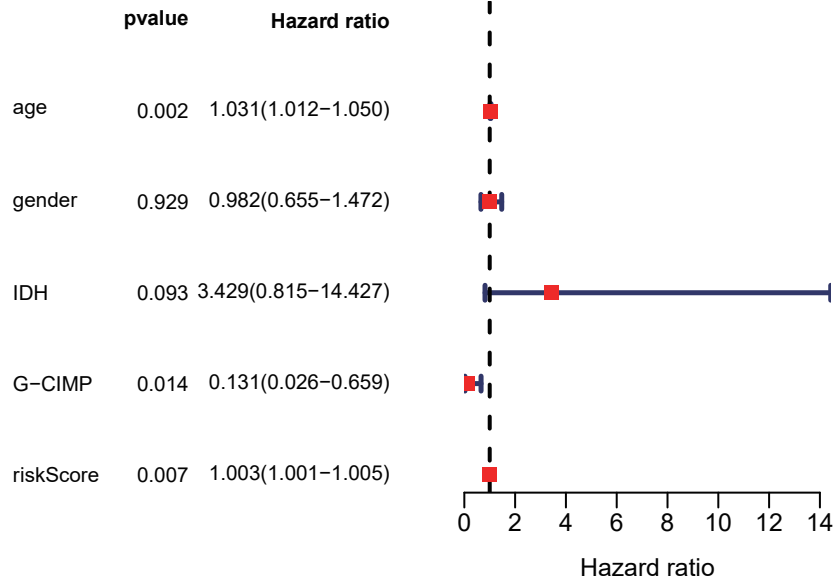

# Supplementary Figure 3

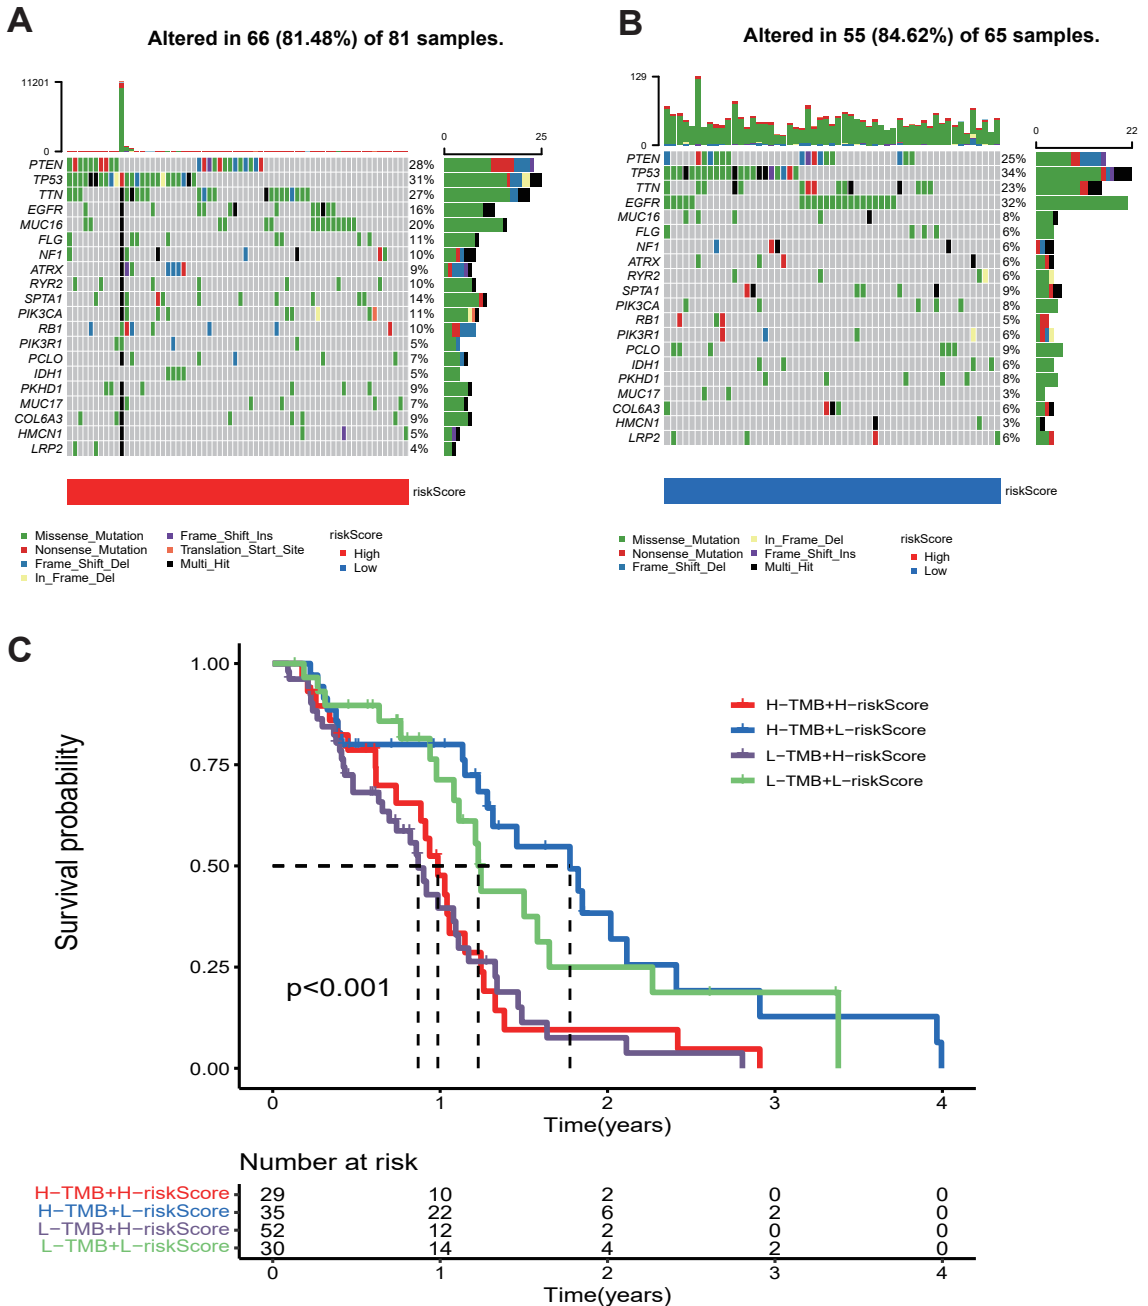

# Supplementary Figure 4

**A**

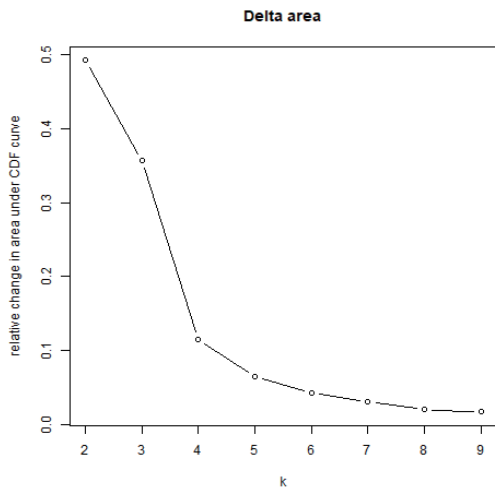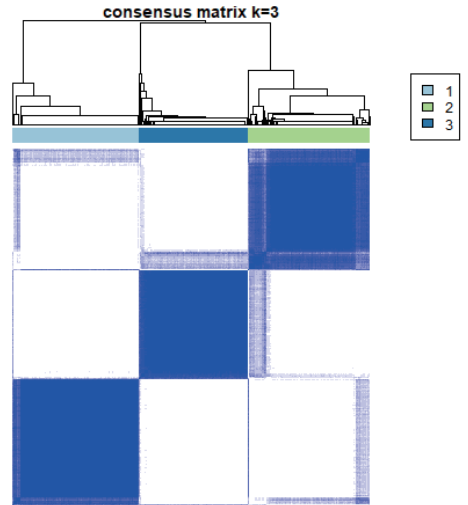

**B**

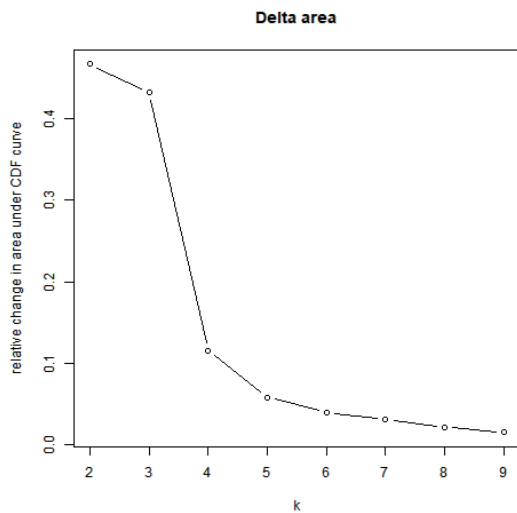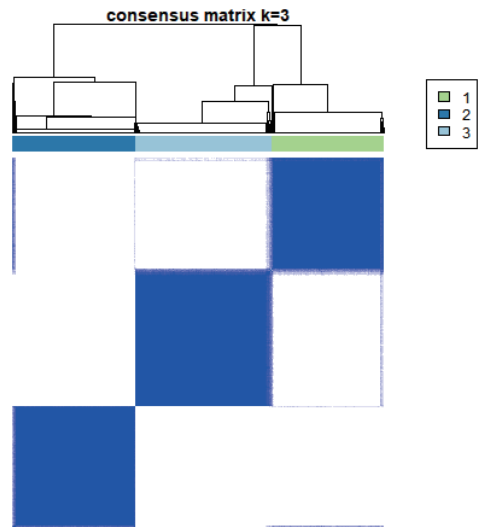

# Supplementary Figure 5

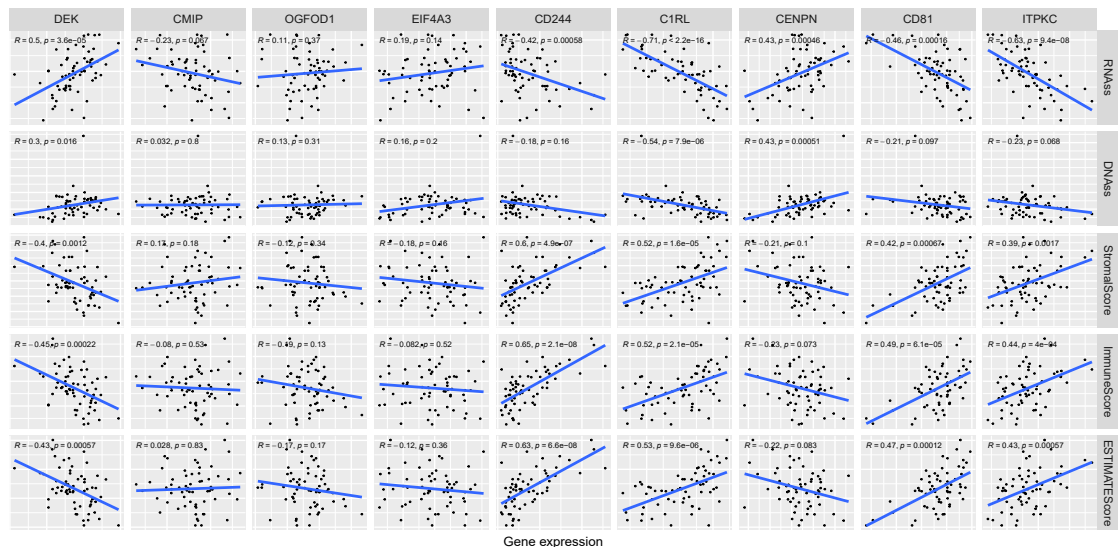

# Supplementary Figure 6

**A**

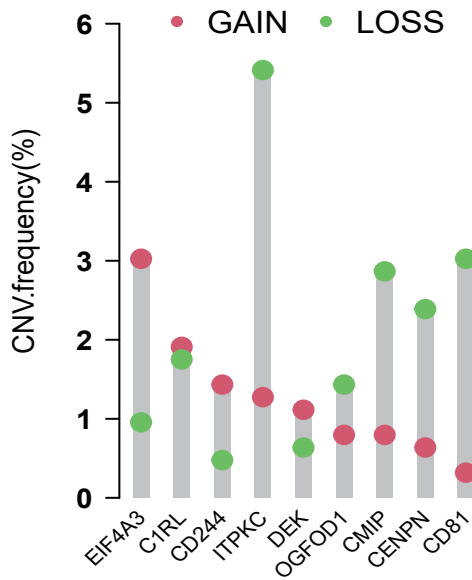

**B**

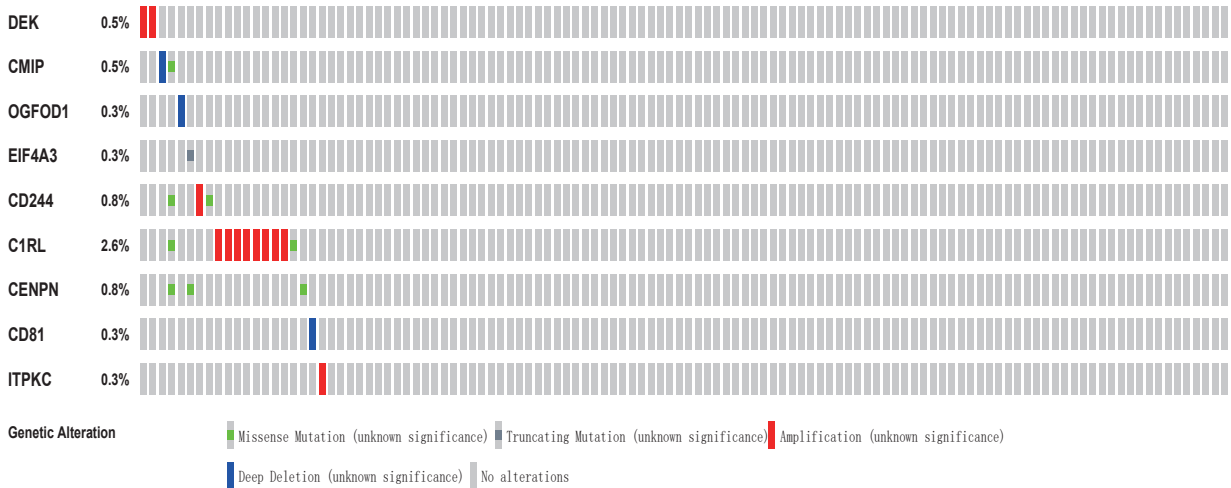

# Supplementary Figure 7

**A**

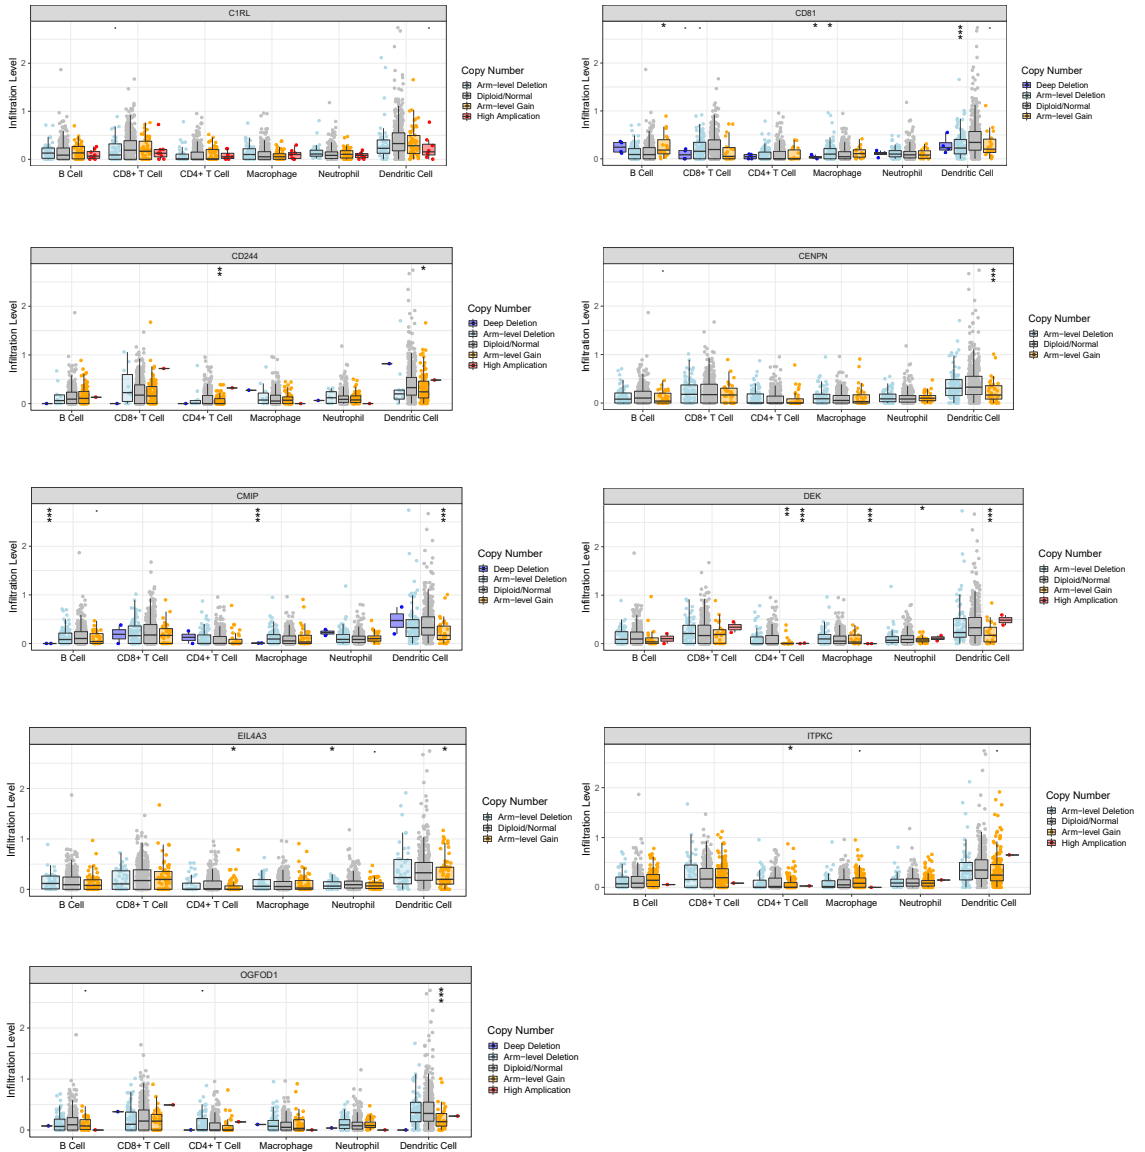

**B**

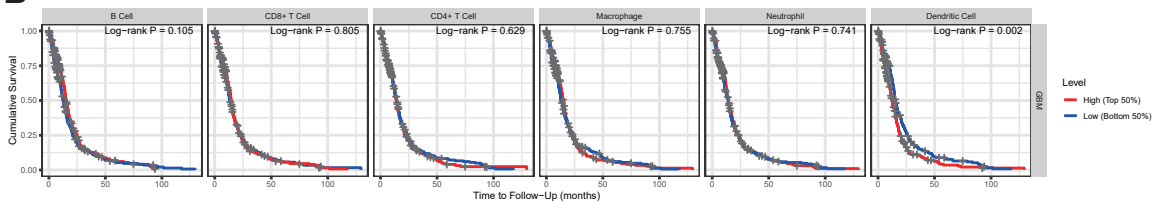

# Supplementary Figure 8

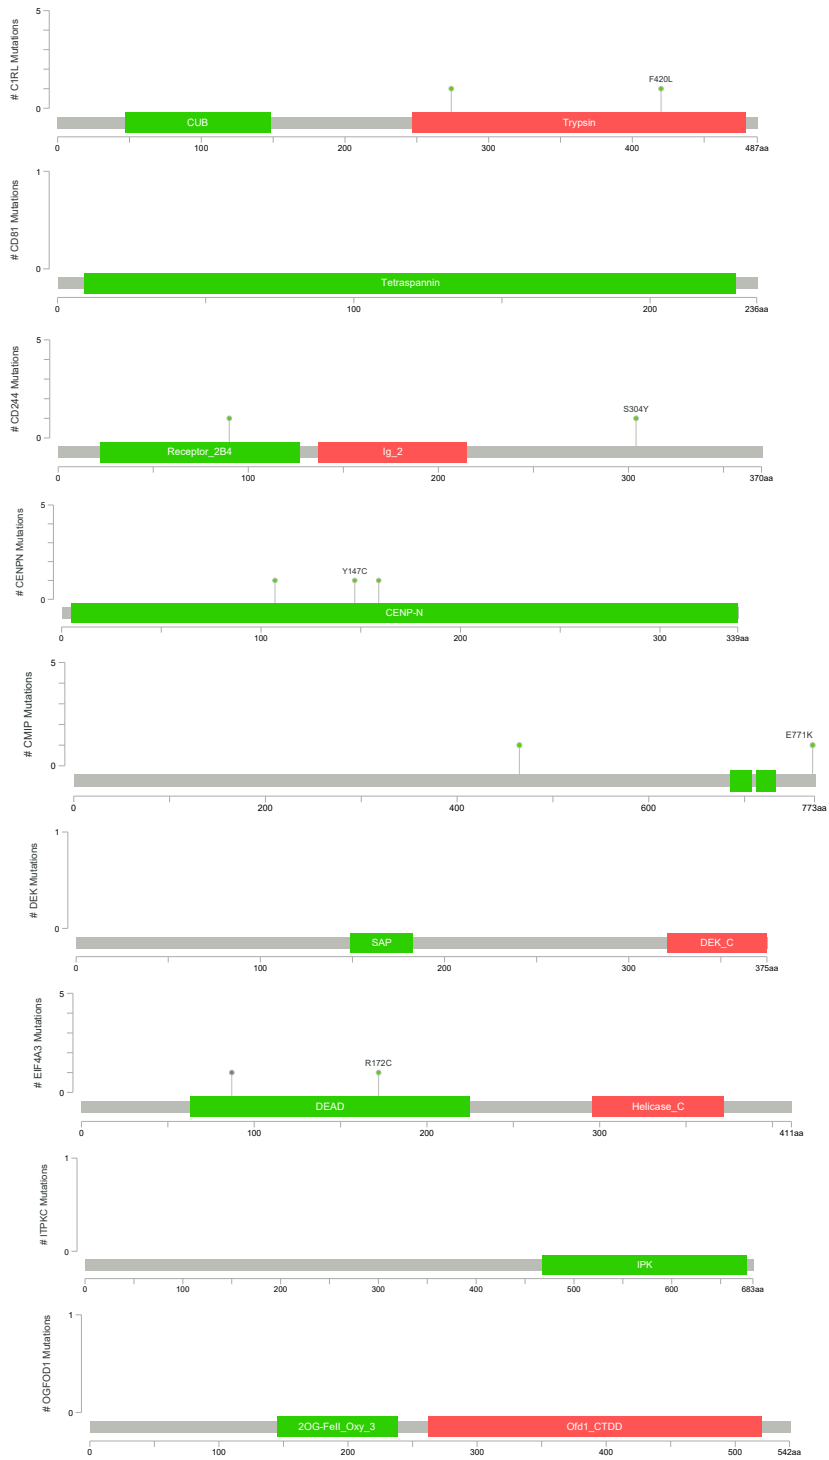

Supplement: DataSheet_2.pdf [file DataSheet_2.pdf]
